# Supplementary material for: Measures Derived from Panoramic Ultrasonography and Animal-Based Protein Intake Are Related to Muscular Performance in Middle-Aged Adults
Source: J Clin Med. 2021 Mar 2;10(5):988. doi: 10.3390/jcm10050988 (PMC7957891; doi:10.3390/jcm10050988)
Supplement: Supplementary file 1 [file jcm-10-00988-s001.csv]

Subject	Gender	Age_years	Height_cm	Weight_kg	BMI	Total_Energy_kcalBYday	Total_Fat_gBYday	Total_CHO_gBYday	Total_Protein_part_of_day_Breakfast	Total_Protein_part_of_day_Lunch	Total_Protein_part_of_day_Dinner	Total_Protein_gBYday	Total_Protein_Animal_Plus_Plant_Double_Check_gBYday	Total_Animal_Protein_gBYday	Total_Plant_Protein_gBYday	Total_Leucine_part_of_day_Breakfast	Total_Leucine_part_of_day_Lunch	Total_Leucine_part_of_day_Dinner	Total_Leucine_gBYday	Total_BCAA_gBYday	Total_glutamate_gBYday	Ratio_Total_Leucine_BY_Glutamate	Relative_Energy_kcalBYkgBYday	Relative_Fat_gBYkgBYday	Relative_CHO_gBYkgBYday	Relative_Protein_gBYkgBYday	Relative_Animal_Protein_gBYkgBYday	Relative_Plant_Protein_gBYkgBYday	Relative_Leucine_gBYkgBYday	Fat_Percent_Energy	CHO_Percent_Energy	Protein_Percent_Energy	Animal_Protein_Percent_of_Energy	Plant_Protein_Percent_Energy	Total_Vit_D_IUBYday	Total_Calcium_mgBYday	Total_Mg_mgBYday	Total_Mn_mgBYday	Total_Vit_K_mcgBYday	Total_Fe_mgBYday	Total_Vit_C_mgBYday	Total_Vit_E_mgBYday	Total_P_mgBYday	Total_K_mgBYday	Accelerometer_Weardays_days	Accelerometer_Weartime_minBYday	Accelerometer_Sedentary_minBYday	Accelerometer_light_PA_minBYday	Accelerometer_Moderate_PA_minBYday
2	0	55	166.9	64.05	22.9935729283975	2183.42	81.22	295.9	4.84333333333333	18.48	43.8933333333333	67.2166666666667	63.1966666666667	36.9	26.2966666666667	.176666666666667	.246666666666667	2.00666666666667	2.43	5.49	6.02	.403654485049834	34.0893052302888	1.26807181889149	4.61982825917252	1.04933645589383	.576112412177986	.410564663023679	.0379391100702576	33.478671075652	54.2085352337159	12.2004238653433	6.76003700616464	4.81751869391444	33.32	924.81	137.96	1.14	174.25	9.56	46.25	3.77	461.36	1688.21	6	927.166666666667	604.833333333333	278	35.6666666666667
4	0	59	158.8	58.82	23.3251273721678	1360.12	62.08	149.45	23.4566666666667	14.0166666666667	13.4333333333333	50.9066666666667	50.4	36.54	13.86	.876666666666667	.0766666666666667	.913333333333333	1.86666666666667	4.22	4.07	.459459459459459	23.1234274056443	1.05542332539952	2.54080244814689	.865351921115267	.621217273036382	.235634138048283	.0317352374475802	41.0787283474988	43.9520042349205	13.211342547531	10.7461106372967	4.07611093138841	24.16	680.67	163.4	1.3	33.06	4.87	21.3	2.78	826.29	1802.61	6	913.833333333333	574.833333333333	302.5	36.1666666666667
5	0	58	164	63.97	23.7842058298632	1839.35	72.83	238.05	12.06	26.8233333333333	19.0366666666667	57.92	52.08	32.11	19.97	.563333333333333	1.26	.373333333333333	2.19666666666667	4.86	5.49	.400728597449909	28.7533218696264	1.13850242301079	3.72127559793653	.905424417695795	.501954040956698	.312177583242145	.0343911208378928	35.6359583548536	51.7682877103325	12.5646045631294	6.98290156848887	4.34283850273194	22.72	432.08	209.74	1.18	34.37	10.33	368.97	3.68	676.41	1692.27	7	762.142857142857	488.285714285714	235.714285714286	38
7	0	59	162.9	103.5	39.0030151026458	1611.55	66.31	211.43	11.4933333333333	6.31333333333333	24.4566666666667	42.2633333333333	41.9266666666667	23.85	18.0766666666667	.446666666666667	.1	1.3	1.84666666666667	4.16	3.9	.474358974358974	15.5705314009662	.640676328502416	2.04280193236715	.408309178743961	.230434782608696	.174653784219002	.0178743961352657	37.0320498898576	52.4786696037976	10.7403359849544	5.91976668424808	4.48677773985707	66.5	420.08	168.4	.81	36.82	12.47	40.31	3.08	572.17	1914.98	6	869.5	653.333333333333	188.833333333333	27.1666666666667
11	0	58	156	48.68	20.0032873109796	1660.99	61.71	216.99	5.24	21.4266666666667	32.74	59.4066666666667	46.1333333333333	26.83	19.3033333333333	.13	.116666666666667	.636666666666667	.883333333333333	1.96	2.05	.429268292682927	34.1205834018077	1.2676663927691	4.45747740345111	1.22041906327034	.551150369761709	.396535195836757	.0180772391125719	33.4372874008874	52.2555825140428	12.5902653788894	6.46120687060127	4.6486332448319	7.54	498.19	150.06	1.35	253.28	11.45	42.89	1.87	311.43	1430.16	6	918.666666666667	535.666666666667	345.5	10.6666666666667
15	0	47	163.2	62.84	23.5936899269512	1816.62	93.38	184.21	12.05	27.1666666666667	20.6166666666667	59.8333333333333	47.91	24.95	22.96	.89	.78	.89	2.56	5.9	6.56	.390243902439024	28.908656906429	1.48599618077658	2.93141311266709	.952259707192871	.397040101845958	.365372374283896	.0407383831954169	46.2628397793705	40.5610419350222	13.5435173763962	5.49371910471095	5.05554271118891	5.25	522.13	330.69	2.41	36.21	20	235.74	8.59	931.28	1501.79	6	849.5	537.833333333333	285.833333333333	25.8333333333333
16	0	45	166.4	69.12	24.9630177514793	1445.18	69.02	143.83	26.2166666666667	29.4233333333333	6.53333333333333	62.1733333333333	54.6733333333333	45.11	9.56333333333333	.486666666666667	.99	.176666666666667	1.65333333333333	3.75	4.21	.394299287410926	20.908275462963	.998553240740741	2.08087384259259	.899450231481481	.652633101851852	.138358410493827	.0240162037037037	42.982881025201	39.8095738939094	16.2951313806435	12.4856419269572	2.64695977894334	562.61	936.69	88.77	3.02	9.74	8.34	86.37	16.05	460.49	1224.36	7	889.428571428571	651.285714285714	204.428571428571	33.4285714285714
17	0	58	168.1	72.02	25.4869396244056	2296.49	129.53	196.69	21.9333333333333	28.5033333333333	35.55	85.9866666666667	79.94	46.3	33.64	.716666666666667	1.57333333333333	1.71	4	8.93	9.05	.441988950276243	31.8868369897251	1.79852818661483	2.73104693140794	1.19397389613996	.642876978617051	.467092474312691	.0555401277422938	50.7631211109127	34.2592390996695	15.4783547835478	8.06448101232751	5.85937670096539	31.91	697.55	327.08	3.47	88.31	10.51	185.79	11.55	1043.14	2702.84	6	833.333333333333	587.166666666667	228.666666666667	17.5
18	0	49	161.9	92	35.0989504269291	1422.73	51.65	190.81	12.5	8.72333333333333	47.4	68.6233333333333	47.53	26.96	20.57	0	.00666666666666667	.985	.991666666666667	1.49	1.68	.392857142857143	15.4644565217391	.561413043478261	2.07402173913043	.528913043478261	.29304347826087	.223586956521739	.00717391304347826	32.673100307156	53.6461591447429	14.6657926264156	7.57979377675314	5.78324769984466	540.72	916.51	166.28	3.15	26.54	33.78	115.67	18.79	594.06	899.59	6	779	477.166666666667	289	12.8333333333333
19	0	53	168.5	89.1	31.3818031328972	1903.96	75.48	230.97	6.45	36.1833333333333	32.56	75.1933333333333	70.4133333333333	51.64	18.7733333333333	.393333333333333	2.52333333333333	1.74666666666667	4.66333333333333	10.43	10.26	.455165692007797	21.3687991021324	.847138047138047	2.59225589225589	.843883277216611	.579573512906846	.210699588477366	.0524130190796857	35.6793209941385	48.5241286581651	15.8689790900505	10.8489674152818	3.94406044944922	154.16	839.16	196.17	2.06	44	17.47	56.25	4.05	886.73	2234.28	7	827.571428571429	488.714285714286	333.428571428571	5.42857142857143
25	0	59	167.3	68.51	24.4772196793845	2281.47	106.19	239.76	32.7033333333333	28.1266666666667	30.85	91.68	91.8266666666667	46.55	45.2766666666667	.13	1.79333333333333	.72	2.64333333333333	5.93	5.59	.472271914132379	33.3012698876077	1.54999270179536	3.49963508976792	1.33819880309444	.679462852138374	.660876757650951	.038534520507955	41.8900971741903	42.0360557009297	16.1725210028445	8.16140470836785	7.9381568316334	2546.19	1462.11	242.46	2.19	90.73	17.01	193.33	27.37	938.25	2006.86	6	885.833333333333	479.5	375.166666666667	30.6666666666667
27	0	47	165.5	72	26.2867261160449	2197.57	56.25	337.12	18.2666666666667	25.8666666666667	41.58	85.7133333333333	84.4566666666667	61.41	23.0466666666667	.446666666666667	1.3	2.8	4.54666666666667	9.99	11.13	.408805031446541	30.5218055555556	.78125	4.68222222222222	1.19041666666667	.852916666666667	.320092592592593	.0631944444444444	23.0368088388538	61.3623229294175	15.4834164318231	11.1778009346687	4.19493652837756	2788.9	1069.8	277.45	2.07	188.98	21.59	95.26	2.29	1229.48	3076.42	6	851.833333333333	484.666666666667	328	38.6666666666667
29	0	59	160	73.13	28.56640625	1646.26	60.86	202.32	11.14	19.21	41.96	72.31	70.0866666666667	44.68	25.4066666666667	.616666666666667	1.10333333333333	1.85	3.57	7.94	7.6	.469736842105263	22.5114180226993	.83221660057432	2.76658006290168	.988787091480924	.610966771502803	.347417840375587	.0488171748940243	33.2717796702829	49.1586991119264	14.3320796975418	10.8561223622028	6.17318447065875	707.04	571.43	271.17	1.02	150.62	7.24	84.78	7.41	843.61	2030.68	6	840.333333333333	541.333333333333	263.333333333333	35.6666666666667
31	0	56	168.1	94.2	33.336152632866	2542.29	95.41	340.8	11.76	21.8233333333333	46.5133333333333	80.0966666666667	79.1866666666667	36.16	43.0266666666667	.51	.81	1.28	2.6	5.71	6.9	.376811594202899	26.9882165605096	1.01284501061571	3.61783439490446	.85031847133758	.383864118895966	.456758669497523	.0276008492569002	33.77624110546	53.6209480429062	12.5438486594838	5.68935880643042	6.76974958272529	359.29	963.04	343.73	2.57	34.2	22.53	70.08	15.85	1009.17	2119.95	6	945.166666666667	594.5	272	78.5
33	0	58	161.2	62.14	23.9133914992396	2377.39	110.27	263.62	12.5666666666667	31.15	38.91	82.6266666666667	77.5	46.44	31.06	.576666666666667	.48	2	3.05666666666667	6.85	7.31	.418604651162791	38.2586095912456	1.77454135822337	4.24235597038944	1.32957837141938	.747344705503701	.49983907306083	.0492436433859028	41.7445181480531	44.3545232376682	14.3955464758179	7.8136107243658	5.22589899006894	205.29	612.94	377.86	4.41	245.07	18.86	770.2	19.64	910.62	2601.48	7	858	522.142857142857	299.714285714286	32.8571428571429
34	0	51	161.1	50.08	19.2962643156665	1933.96	84.08	233.78	23.79	3.08666666666667	33.6566666666667	60.5333333333333	60.0966666666667	42.88	17.2166666666667	1.13	0	1.34333333333333	2.47333333333333	5.37	4.9	.504081632653061	38.6174121405751	1.67891373801917	4.66813099041534	1.2086661341853	.856230031948882	.343783280085197	.0493210862619808	39.1280067840079	48.3526029493888	11.8847650977062	8.86884940743345	3.56091473798148	82.04	392.06	129.65	.77	109.16	11.29	57.32	12.13	570.36	1242.64	7	922.285714285714	677.428571428571	222.857142857143	20.2857142857143
37	0	45	160	71.38	27.8828125	2492.68	80.32	351.32	18.5166666666667	50.96	21.65	91.1266666666667	83.78	42.75	41.03	.22	1.1	.536666666666667	1.85666666666667	4.08	4.53	.410596026490066	34.9212664611936	1.12524516671337	4.92182684225273	1.2766881479406	.598907256934716	.574810871392547	.0260577192490894	29.000112328899	56.3762697177335	14.4310061560997	6.86008633278239	6.58407818091372	133.23	1120.29	123.32	1.14	26.25	20.53	41.05	3.72	549.89	1694.51	7	854.857142857143	466.714285714286	310.428571428571	62.2857142857143
38	0	58	161.7	66.02	25.2496568425537	1402.61	53.45	172.65	20.7233333333333	17.8866666666667	19.1266666666667	57.7366666666667	56.34	36.58	19.76	.736666666666667	.746666666666667	1.17666666666667	2.66	6.01	6.15	.432520325203252	21.2452287185701	.809603150560436	2.61511663132384	.87458345955771	.554074522871857	.299303241441987	.0402908209633444	34.2967752974811	49.2367800029944	16.886003392408	10.4319803794355	5.63520864673715	173.05	1104.06	181.19	1.68	77.77	39.6	146.91	7	932.66	1410.91	8	970.125	710.375	242.75	17
39	0	45	168.7	57.44	20.1829324212597	1779.14	77.66	217.3	9.77333333333333	8.32333333333333	34.6566666666667	52.7533333333333	58.9833333333333	39.82	19.1633333333333	.123333333333333	.336666666666667	1.33	1.79	3.97	5.04	.35515873015873	30.9738857938719	1.35201949860724	3.78307799442897	.918349582172702	.693245125348189	.333623491179202	.0311629526462396	39.2852726598244	48.855064806592	12.0523907716386	8.95264003956968	4.308448651221	283.76	510.8	134.69	1.39	39.09	7.99	180.5	10.38	541.43	1337.8	7	982.571428571429	566.285714285714	385.857142857143	30.4285714285714
41	0	45	170.7	68.09	23.3677174074566	2094.47	102.39	213.25	23.36	19.5866666666667	37.04	79.9866666666667	72.83	51.65	21.18	1.44333333333333	.193333333333333	2.37333333333333	4.01	8.84	9.55	.419895287958115	30.7603172271993	1.50374504332501	3.13188427081803	1.17476868850051	.758554853869878	.311058892642091	.0588926420913497	43.99728809675	40.726293525331	13.9326273252978	9.86407062407196	4.0449373827269	577.68	938.76	160.15	1.58	107.98	15.47	117.43	15.76	763.51	1477.93	7	905.714285714286	676.428571428571	198.428571428571	30.7142857142857
45	0	47	170.5	71.01	24.4270345112271	1943.84	90	191.87	22.3766666666667	35.9933333333333	33.2166666666667	91.5866666666667	84.6866666666667	58.07	26.6166666666667	1.2	1.34666666666667	.916666666666667	3.46333333333333	7.51	9.04	.382743362831858	27.3741726517392	1.26742712294043	2.70201380087312	1.28981833544571	.817772144768342	.374829836173309	.0487255316152655	41.6700963042226	39.4826734710676	17.8267829945842	11.9495431722776	5.47713117677724	3.4	743.91	218.45	1.5	91.46	9.65	70.21	8	809.96	1687.11	6	852.333333333333	556	264	32.3333333333333
46	0	56	171.3	66.7	22.7306109081714	2083.77	101.77	210.36	19.4766666666667	21.58	40.5433333333333	81.6	76.52	46.16	30.36	1.14666666666667	.533333333333333	1.74333333333333	3.42333333333333	7.66	7.47	.459170013386881	31.2409295352324	1.52578710644678	3.15382308845577	1.22338830584708	.692053973013493	.455172413793103	.051424287856072	43.9554269425129	40.3806562144575	15.6203639008796	8.86086276316484	5.82789847248017	700.14	849.65	191.74	1.17	99.36	12.66	4.92	5.2	973.57	1635.31	8	906.375	464.125	423.75	18.375
47	0	55	170.4	78.89	27.1695706319293	2641.19	83.39	372.99	17.0366666666667	44.0166666666667	38.6266666666667	99.68	101.353333333333	56.71	44.6433333333333	.38	1.53	2.39666666666667	4.30666666666667	9.57	9.03	.476190476190476	33.4794016985676	1.05704145012042	4.72797566231462	1.26353149955634	.718849030295348	.56589343812059	.0545907804115435	28.4156005436943	56.4881738913141	15.2220389713518	8.58855288714557	6.76109379989071	56.89	671.16	259.29	2.7	122.08	18.09	180.74	7.36	1382.06	3717.46	7	904.857142857143	573	287.571428571429	44.2857142857143
49	0	57	163.6	66.05	24.6777876746313	1796	94.8	147.19	22.3833333333333	21.2333333333333	44.8966666666667	88.5133333333333	81.407	66.6	14.807	.893333333333333	1.02666666666667	2.60333333333333	4.52333333333333	10.1	9.98	.453907815631263	27.1915215745647	1.43527630582892	2.22846328538986	1.34004542013626	1.00832702498107	.224178652535958	.0685844057532173	47.5055679287305	32.7817371937639	17.7530399899712	14.8329621380846	3.2977728285078	156.39	808.64	239.95	1.98	100.3	9.2	56.35	13.06	888.93	1633.11	4	716.5	485.25	215	16.25
50	0	46	168.3	63.76	22.5102374625285	1504.61	66.33	174.65	0	19.9266666666667	32.33	52.2566666666667	48.2733333333333	32.7	15.5733333333333	0	1.06666666666667	1.23333333333333	2.3	5.09	4.56	.504385964912281	23.5980238393977	1.04030740276035	2.73917816813049	.819636135508156	.512860727728984	.244249268088666	.0360727728983689	39.6760622353966	46.4306365104579	13.5681229594916	8.69328264467204	4.14016478245747	48.15	432.12	109.22	1.13	14.48	6.26	31.2	3.43	465.01	704.18	6	906.5	669.5	208.166666666667	25.3333333333333
1	0	59	158.2	63.53	25.3843412218047	1230.19	39.67	141.3	13.99	12.34	50.6666666666667	76.9966666666667	76.05	63.46	12.59	.813333333333333	.0266666666666667	2.36	3.2	6.98	7.01	.456490727532097	19.3639225562726	.62442940343145	2.22414607272155	1.21186840862585	.998898158350386	.198174090980639	.0503699039823705	29.0223461416529	45.9441224526293	24.1457715889668	20.6342109755404	4.09367658654354	532.67	848.46	148.17	1.3	16.53	13.1	94.21	12.87	811.33	1495.19	8	888.75	586.875	266.125	27.75
3	0	56	161.6	55.8	21.3673904519165	2243.36	105.88	220.37	24.7666666666667	22.0633333333333	55.41	102.24	96.21	66.58	29.63	.05	.566666666666667	.73	1.34666666666667	3.12	3.43	.393586005830904	40.2035842293907	1.89749103942652	3.94928315412186	1.83225806451613	1.19318996415771	.531003584229391	.0241935483870968	42.4773553954782	39.2928464446188	18.8007704932352	11.8714784965409	5.28314670850866	105.58	1231.09	249.39	.86	80.07	12.51	60.51	6.9	727.98	1392.17	7	853.714285714286	605.571428571429	194.285714285714	41.1428571428571
6	0	60	162.3	60.25	22.8728357646873	1422.67	52.75	138.75	40.1	25.9233333333333	32.21	98.2333333333333	96.84	71.25	25.59	.69	1.13333333333333	.733333333333333	2.55666666666667	5.66	6.7	.382089552238806	23.6127800829876	.87551867219917	2.30290456431535	1.6303734439834	1.18257261410788	.424730290456432	.0424896265560166	33.3703529279453	39.0111550816423	27.8104540467849	20.0327553121947	7.19492222370613	574.3	1135.12	243.48	7.34	702.28	24.25	285.88	73.41	779.62	1960.87	6	883.166666666667	499.166666666667	345.666666666667	32
8	0	59	176.4	67.7	21.7566240403947	2328.2	78.2	274.33	23.1633333333333	25.51	83.0966666666667	131.77	130.763333333333	86.28	44.4833333333333	1.43333333333333	.703333333333333	5.06	7.19666666666667	15.92	16.27	.442532267977873	34.3899556868538	1.15509601181684	4.05214180206795	1.94638109305761	1.27444608567208	.657065484982767	.106351550960118	30.2293617386822	47.1316897173782	22.5742760838933	14.8234687741603	7.64252784697764	772.5	1756.24	423.35	6.91	32.08	9.84	212.01	39.45	1573.01	3360.9	6	1007.33333333333	689	296.333333333333	18.3333333333333
9	0	49	164.9	77.28	28.4201131141096	1927.29	90.69	181.52	10.1866666666667	31.43	75.5866666666667	117.203333333333	96.1966666666667	74.53	21.6666666666667	.396666666666667	.91	.92	2.22666666666667	3.6	4.65	.348387096774194	24.9390527950311	1.1735248447205	2.34886128364389	1.24547101449275	.964415113871636	.280365769496204	.0288129744651484	42.3501393147892	37.6736246231755	18.2641036831818	15.4683519345817	4.49681504426769	36.77	738.27	105.84	.79	7.23	12.03	29.1	2.1	332.04	1009.8	6	829.833333333333	556.166666666667	260.333333333333	13.3333333333333
10	0	48	170.8	67.15	23.0181430271652	1439.54	31.58	199.22	0	56.8666666666667	49.115	105.981666666667	89.4266666666667	72.11	17.3166666666667	0	1.97	0	1.97	4.42	4.6	.428260869565217	21.4376768428891	.470290394638868	2.96679076693969	1.33447505584512	1.07386448250186	.257880367336808	.02933730454207	19.7438070494741	55.3565722383539	24.2539888758069	20.0369562499132	4.81172226313035	122.61	498.85	73.8	.51	6.6	7.05	1.96	2.12	392.61	815.12	6	851.666666666667	533.166666666667	298.5	18.6666666666667
12	0	48	163.5	73.27	27.4088413807293	1578.05	71.69	137.6	24.37	38.7533333333333	32.48	95.6033333333333	94.05	73.96	20.09	.193333333333333	1.54	0	1.73333333333333	3.8	3.76	.462765957446809	21.5374641736045	.978435921932578	1.87798553296028	1.30489968609253	1.00941722396615	.274191347072472	.0237477821755152	40.8865371819651	34.8784892747378	18.7396180928161	18.7471879851716	5.09236082506891	92.14	1525.1	136.63	.95	5.08	11.03	92.76	13.52	787.97	1754.97	6	954.333333333333	709.5	220	22
13	0	49	164.4	72.08	26.6692714345759	1514.25	45.81	174.08	7.00666666666667	26.1566666666667	68.2466666666667	101.41	98.6733333333333	84.97	13.7033333333333	.0233333333333333	.0133333333333333	4.91	4.94666666666667	10.76	9.74	.508213552361396	21.0079078801332	.63554384017758	2.41509433962264	1.4069089900111	1.17882907880133	.190112837587865	.0686736958934517	27.2273402674591	45.9844807660558	25.79504626244	22.4454350338451	3.61983380111166	141.94	995.19	286.83	1.79	416.58	15.52	222.8	6.57	871.51	2665	7	811.571428571429	478.285714285714	274.714285714286	57.7142857142857
14	0	54	166.9	65.05	23.3525670412531	2371.39	116.59	222.59	26.4266666666667	20.8733333333333	60.6266666666667	107.926666666667	102.056666666667	73.56	28.4966666666667	.68	.11	2.45	3.24	7.66	7.11	.455696202531646	36.4548808608763	1.79231360491929	3.42182936202921	1.65918524212145	1.13082244427364	.438073276966436	.0498078401229823	44.2487317564804	37.545911891338	18.1512407187844	12.4079126588204	4.80674484866119	33.97	758.86	329.46	2.57	160.3	11.22	156.95	17.19	1117.51	2072.02	7	934.857142857143	604.285714285714	303.428571428571	27.1428571428571
20	0	50	169.9	75.18	26.0444723742561	1317.37	34.37	166.01	30.8666666666667	18.5166666666667	36.62	86.0033333333333	80.0466666666667	65.46	14.5866666666667	.14	.89	.00333333333333333	1.03333333333333	2.27	2.83	.367491166077739	17.5228784251131	.457169459962756	2.20816706570896	1.1439212556531	.870710295291301	.194023233129378	.0138334663474328	23.4808747732224	50.4064917221434	25.920986203103	19.875964990853	4.42902652001083	404.55	497.34	225.86	2.72	566.31	14.04	269.44	14.4	640.99	2274.83	7	851.571428571429	608.142857142857	229.857142857143	13.5714285714286
21	0	62	158.6	64.35	25.5824530213135	1448.84	36.44	208.88	7.57	36.38	27.3966666666667	71.3466666666667	68.59	56.69	11.9	.01	1.55	.25	1.81	4.02	4.01	.451371571072319	22.5149961149961	.566278166278166	3.24599844599845	1.10862470862471	.880963480963481	.184926184926185	.0281274281274281	22.6360398663759	57.6682035283399	19.9810944228547	15.6511416029375	3.28538693023384	1978.56	3073.12	240.7	5.04	59.97	8.94	162.5	29.24	526.15	1439.68	7	890.857142857143	665.428571428571	214.285714285714	11.1428571428571
22	0	53	161.7	66.77	25.5364978397048	1643.44	81.56	133.7	26.09	16.55	56.5266666666667	99.1666666666667	92.6	73.75	18.85	.446666666666667	.015	2.69666666666667	3.15833333333333	6.97	6.3	.501587301587302	24.6134491538116	1.22150666466976	2.00239628575708	1.40257600718886	1.10453796615246	.282312415755579	.0473266437022615	44.6648493404079	32.5414983205958	22.8576310072978	17.9501533369031	4.5879374969576	5133.34	3003.11	76.93	.74	20.45	76.17	146.17	1.87	412.6	811.37	7	835.142857142857	609.857142857143	213.285714285714	12
23	0	54	171.1	62.22	21.2534769178428	1454.61	71.81	130.85	8.34	35.0366666666667	27.85	71.2266666666667	68.73	43.72	25.01	.206666666666667	.266666666666667	.206666666666667	.68	1.56	2.11	.322274881516588	23.3784956605593	1.15413050466088	2.10302153648345	1.1448087431694	.702667952426872	.401960784313726	.0109289617486339	44.4304658980758	35.9821532919477	20.2248786166558	12.0224665030489	6.87744481338641	842.5	1549.94	191.83	2.79	46.61	16.33	198.33	16.38	377.83	897.59	7	864.571428571429	554.571428571429	264.142857142857	40.1428571428571
24	0	57	161.6	75.3	28.8344892657583	2067.41	79.09	246.67	9.95666666666667	32.19	50.0833333333333	92.23	88.9433333333333	74.76	14.1833333333333	.03	1.12	.823333333333333	1.97333333333333	4.24	4.19	.470167064439141	27.4556440903054	1.05033200531209	3.27583001328021	1.22483399734396	.992828685258964	.188357680389553	.0261620185922975	34.4300356484684	47.7254148910956	18.2252016816271	14.4644748743597	2.74417427280188	1473.68	918.54	228.02	2.4	26.2	9.49	109.37	23.04	645.06	1313.18	1	328	281.6	44.2	2.2
26	0	54	169.8	70.61	24.49011585722	1716.94	54.98	213.14	30.7333333333333	42.3266666666667	19.33	92.39	90.72	66.54	24.18	1.10666666666667	2.36666666666667	1.03	4.50333333333333	9.96	11.02	.408348457350272	24.3158192890525	.77864325166407	3.01855261294434	1.30845489307464	.942359439172922	.342444412972667	.063730349808809	28.8198772234324	49.6557829627127	22.3284253010374	15.5019977401656	5.63327780819365	948.96	1982.05	353.66	2.71	226.54	23.09	903.58	4.8	1229.76	3159.64	7	946	514.142857142857	405.285714285714	26.5714285714286
28	0	59	159.5	69.26	27.2245752301962	1929.8	74.8	216.32	33.4	17.33	47.1	97.83	96.2766666666667	77.58	18.6966666666667	.2	.27	2.37666666666667	2.84666666666667	6.2	6.18	.461165048543689	27.8631244585619	1.0799884493214	3.12330349408028	1.41250360958706	1.12012705746463	.269948984502839	.0411492925209356	34.8844439838325	44.8378070266349	19.8056483449742	16.0804228417453	3.87535841365254	42.64	765.88	180.67	1.66	66.24	15.4	31.88	5.56	706.66	2086.84	6	904.666666666667	624.333333333333	248.833333333333	21.6666666666667
30	0	59	153.8	68.54	28.9755327118291	1499.9	62.38	152.73	15.6966666666667	8.16333333333333	58.0333333333333	81.8933333333333	80.2833333333333	68.41	11.8733333333333	1.26666666666667	.05	1.29333333333333	2.61	5.94	6.31	.413629160063391	21.8835716370003	.910125474175664	2.22833381966735	1.19477677268748	.998103297344616	.173232175858379	.0380799533119346	37.4304953663578	40.7307153810254	21.4028553693358	18.2438829255284	3.16643331777674	151.53	1127.05	222.31	2.78	194.48	32.95	213.53	33.35	902.31	2318.96	7	930.857142857143	598.857142857143	297.142857142857	34.8571428571429
32	0	50	171.5	75.87	25.7953743763228	1534.41	60.13	178.08	12.6166666666667	31.1833333333333	26.4333333333333	70.2333333333333	67.2	47.71	19.49	.0766666666666667	1.14333333333333	1.17333333333333	2.39333333333333	5.36	5.15	.464077669902913	20.2241992882562	.792539870831686	2.34717279557137	.925662317121392	.628838803216027	.256886780018453	.0315012521418215	35.268930729075	46.4230551156471	18.4318614264156	12.4373537711563	5.08078023474821	54.18	811.3	150.99	1.2	182	8.52	169.53	2.65	594.53	1510.92	6	861.833333333333	563	262.833333333333	36
35	0	49	165.5	91.02	33.2308029317001	2070.06	57.74	283.96	14.22	26.49	62.9266666666667	103.636666666667	99.8133333333333	72.02	27.7933333333333	.243333333333333	1.28666666666667	3.53666666666667	5.06666666666667	11.25	11.02	.460072595281307	22.7429136453527	.634366073390464	3.1197539002417	1.13865084596792	.79125466930345	.305354134622427	.0557020435069216	25.1036201849222	54.8699071524497	20.3469025158776	13.9165048356086	5.37053676382971	296.96	974.61	210.15	1.38	27.84	16.98	77.81	11.06	1036.37	1962.62	7	804	599.571428571429	201.285714285714	3.14285714285714
36	0	56	172.2	76.65	25.8491260870797	1039.05	54.65	72.2	22.1966666666667	23.9766666666667	18.4266666666667	64.6	64.8566666666667	49.99	14.8666666666667	.61	.31	.17	1.09	2.49	2.11	.516587677725119	13.5557729941292	.712981082844096	.94194390084801	.842791911285062	.65218525766471	.193955207653838	.0142204827136334	47.3365093113902	27.7946200856552	23.2522563867217	19.2445021895	5.72317661966861	52.15	554.68	127.18	1.23	228.15	7.12	105.46	4.26	385.83	1308.11	7	922.285714285714	552.857142857143	309	55.8571428571429
40	0	41	161.9	67.33	25.6870905678819	1619.56	49.04	217.07	8.72	36.92	31.84	77.48	68.2266666666667	33.6	34.6266666666667	.06	1.08333333333333	.563333333333333	1.70666666666667	3.8	5.32	.319548872180451	24.0540620822813	.728352888756869	3.22397148373682	1.15075003713055	.499034605673548	.514282885291351	.0252487746918164	27.2518461804441	53.6120921731828	19.0997386974313	8.2985502235175	8.55211703590276	46.73	822.45	261.85	2.87	244.48	12.35	144	2.43	625.99	1914.73	6	858.166666666667	490.5	338.333333333333	29.3333333333333
42	0	60	173	70.83	23.6660095559491	1079.36	34.84	119.71	5.42333333333333	9.77666666666667	56.5366666666667	71.7366666666667	71.56	66.06	5.5	.0133333333333333	0	3.06666666666667	3.08	6.8	5.81	.530120481927711	15.2387406466187	.491881970916278	1.69010306367358	1.01284766341945	.932655654383736	.0776507129747282	.0434843992658478	29.0505484731693	44.3633264156537	26.9210923794245	24.4811740290543	2.03824488585829	1521.72	951.94	102.13	.03	79.91	6.97	115.31	14.29	709.81	1511.81	7	846.285714285714	575.142857142857	249.857142857143	21.2857142857143
43	0	45	164.7	61.64	22.7235108340347	1329.07	55.39	124.71	16.4766666666667	12.7	53.7566666666667	82.9333333333333	80.7833333333333	61.61	19.1733333333333	.316666666666667	.243333333333333	2.68666666666667	3.24666666666667	7.25	7.3	.445205479452055	21.5618105126541	.898604802076574	2.02319922128488	1.34539260220636	.999513303049968	.311053428509626	.0526714254812892	37.5081824132664	37.5330118052473	24.9580546380661	18.5422889689783	5.77045101712726	236.41	1291.3	145.98	.39	47.82	8.95	57.07	1.78	765.45	1781.11	7	962.428571428571	550.285714285714	333.571428571429	36.2857142857143
44	0	53	167	76.07	27.2759869482592	1543.42	61.82	157.85	18.18	28.8333333333333	41.8966666666667	88.91	84.75	63.36	21.39	.813333333333333	1.27	.103333333333333	2.18666666666667	5.02	4.53	.483443708609271	20.289470224793	.812672538451426	2.07506244248718	1.16879190219535	.832917050085448	.281188379124491	.0287454537487402	36.0485156341113	40.9091498101618	21.2735157768805	16.420676160734	5.54353319252051	62.39	838.57	269.86	2.96	64.74	14.25	72.65	5.39	788.73	1901.16	7	811.142857142857	503.142857142857	260	44.8571428571429
48	0	48	171.5	59.06	20.0800686788668	3430.12	129.48	406.88	16.39	77.6766666666667	65.2533333333333	159.32	155.253333333333	112.1	43.1533333333333	.206666666666667	1.54	4.16666666666667	5.91333333333333	12.94	12.76	.463949843260188	58.0785641720284	2.19234676600068	6.8892651540806	2.69759566542499	1.89806975956654	.730669375776047	.100237047070775	33.9731554581181	47.4479026972817	18.89485497084	13.0724289529229	5.03228264122927	185.52	1392.11	405.39	2.68	24.51	27.41	224.97	16.24	1540.56	3210.58	6	851	527.5	258.333333333333	19.6666666666667
51	1	60	159.4	61.94	24.3243779690675	2688.59	56.95	458.63	21.0233333333333	29.8966666666667	34.45	85.37	85.0133333333333	43.4966666666667	41.5166666666667	.746666666666667	1.23666666666667	.903333333333333	2.88666666666667	6.5	6.45	.446511627906977	43.4063609945108	.919438165967065	7.40442363577656	1.37843073942525	.702238725648477	.670272306533204	.0466042406630072	19.0638959454584	68.2335350499704	12.9832311335997	6.47129784261143	6.17671964362981	349.05	1103.57	256.54	2.12	20.42	18.43	607.68	2.38	773.6	3403.48	7	904.71	466.857	358	79.286
53	1	49	192.2	77.2	20.8524798369881	2713.72	97.92	371.01	22.5233333333333	29.4366666666667	35.13	87.09	85.13	52.39	32.74	.693333333333333	1.71333333333333	.54	2.94666666666667	6.77	6.96	.422413793103448	35.1518134715026	1.26839378238342	4.80582901554404	1.12823834196891	.678626943005181	.424093264248705	.0381692573402418	32.4749789956223	54.6865557242457	12.6852819416783	7.72224105655705	4.82584791356514	1362.08	837.47	216.02	2.55	77.66	19.79	150.6	4.51	919.04	2353.15	7	879.14	710.571	154.143	13.571
55	1	47	196.1	87.7	22.7557724485325	3260.83	126.27	387.93	9.485	72.5733333333333	64.2733333333333	146.331666666667	141.256666666667	115.363333333333	25.8933333333333	.47	4.19333333333333	.713333333333333	5.37666666666667	11.84	11.78	.443123938879457	37.1816419612315	1.43979475484607	4.42337514253136	1.63249714937286	1.31543139490688	.295248954770049	.0613074876472824	34.8509428581067	47.5866573847763	17.3535712878818	14.151407259297	3.17628742784301	114.01	914.19	325.17	3.06	199.6	19.7	152.09	9.46	1323.02	3209.1	7	959.29	650.286	270.857	38.143
56	1	48	172.6	99.81	33.4302519029411	2497.52	105.36	292.57	6.76333333333333	29.8266666666667	58.16	94.75	94.0366666666667	68.0366666666667	26	.0166666666666667	.46	2.72	3.19666666666667	7.16	7.35	.435374149659864	25.022743212103	1.0556056507364	2.93126941188258	.949303676986274	.681661824132519	.260494940386735	.0320275189526768	37.9672635254172	46.8576828213588	14.2534251469532	10.8966761694267	4.16413081777123	65.39	979.61	254.04	1.72	52.02	14.51	103.64	10.9	1159.56	2112.81	7	875	696.143	169	9.857
59	1	44	182.7	78.81	23.5587047316406	4688.66	121.34	738.88	37.3733333333333	30.49	92.4066666666667	160.27	158.126666666667	104.636666666667	53.49	1.92666666666667	1.41333333333333	2.73333333333333	6.07333333333333	13.66	15.14	.400924702774108	59.4932115213805	1.53965232838472	9.37545996700926	2.03362517447025	1.32770798967982	.678720974495622	.0770629784714292	23.2915161261427	63.0354941497144	13.9062303417339	8.92678647346292	4.5633507228078	559.79	2716.42	610.51	2.46	126.76	59.78	293.18	5.37	2935.34	5130.15	7	917.71	584.714	284.286	45.857
60	1	59	173.6	87.75	29.0532592684912	3153.23	149.71	333.9	24.8666666666667	51.59	41.0966666666667	117.553333333333	115.236666666667	74.53	40.7066666666667	.61	1.6	2.16	4.37	9.77	12.44	.351286173633441	35.934245014245	1.70609686609687	3.8051282051282	1.3397150997151	.849344729344729	.463893637226971	.0498005698005698	42.7304700259734	42.3565677099355	15.3111792707784	9.45443243911799	5.1638055792526	102.7	1166.69	443.92	4.47	44.2	31.5	210.77	33.13	1501.86	2969.28	6	922.33	619.667	287.667	15
64	1	63	170	72.87	25.1592738926074	2867.38	107.98	358.2	18.7966666666667	18.5833333333333	78.31	115.69	113.32	68.6	44.72	.25	.68	2.68333333333333	3.61333333333333	8.24	8.27	.436517533252721	39.3492520927679	1.4818169342665	4.91560312885961	1.58762179223274	.941402497598463	.613695622341155	.049586020767577	33.8922640180234	49.9689612119775	14.9458215583367	9.56971172289686	6.23844764209836	1588.2	1066.77	335.95	4.2	218.9	15.15	124.5	9.91	1314.39	2844.32	7	900.86	561.571	296.143	41.143
67	1	47	175	76.46	24.9118151429193	3214.49	136.85	371.64	18.6766666666667	35.62	69.7733333333333	124.07	120.766666666667	83.8333333333333	36.9333333333333	.736666666666667	2.65333333333333	4.17	7.56	16.86	16.58	.455971049457177	42.041459586712	1.78982474496469	4.86058069578865	1.62267852471881	1.09643386520185	.483041241607812	.0988752288778446	38.3155648329906	46.2455941689039	14.5377636778538	10.4319295855123	4.59585605596326	70.78	970.65	560.68	5.24	446.4	13.95	196.82	11.35	1780.57	4423.9	7	1001.86	659.857	269.429	59.143
68	1	55	185.8	92.5	26.7360650793984	2764.97	89.17	384.96	31.5533333333333	34.26	39.8366666666667	105.65	104.596666666667	71.6033333333333	32.9933333333333	1.06	2.27333333333333	2.24333333333333	5.57666666666667	12.42	11.96	.466555183946488	29.8915675675676	.964	4.16172972972973	1.14216216216216	.77409009009009	.356684684684685	.0602882882882883	29.0249080460186	55.6910201557341	15.5057531994834	10.3586416248036	4.77304756772527	230.44	1219.77	242.65	1.38	42.62	39.51	86.22	10.28	1315.68	2514.27	6	955.17	641	278.333	30.667
69	1	44	172.5	81.26	27.2487004988509	3007.81	96.93	412.73	0	28.4566666666667	92.67	121.126666666667	121.346666666667	87.61	33.7366666666667	0	.49	3.8	4.29	9.48	8.72	.49197247706422	37.0146443514644	1.1928378045779	5.07912872261875	1.49064730494708	1.07814422840266	.415169415046353	.0527935023381738	29.0034942366705	54.8877754911381	15.8126966306803	11.6510018917418	4.48654225721261	56.3	768.64	157.86	.93	44.29	14.8	52.58	3.92	1085	1971.47	9	759.89	394.667	348	17.222
74	1	49	187	85.52	24.402350197916	2611.07	98.47	329.54	15.1766666666667	28.42	58.07	101.666666666667	99.9	70.4966666666667	29.4033333333333	1.03666666666667	.806666666666667	1.63	3.47333333333333	7.73	9.47	.366420274551214	30.5316884939196	1.15142656688494	3.85336763330215	1.18884471468662	.824329591518553	.343818210165263	.0406142812597443	33.941257798527	50.4835182511384	13.9584212856657	10.7996593988927	4.50441134605098	389.29	1608.7	369.29	2.45	26.57	23.23	26.25	2.35	1429.35	3206.36	8	861.75	514.75	314.125	32.875
76	1	58	187.4	78.79	22.3861342362987	2853.1	114.78	348.22	24.1666666666667	41.6133333333333	41.0266666666667	106.806666666667	98.0266666666667	68.9966666666667	29.03	.94	.796666666666667	1.01666666666667	2.75333333333333	6.18	6.39	.431924882629108	36.2114481533189	1.45678385581927	4.41959639548166	1.35550196725473	.875703346448365	.36844777255997	.0349452130134958	36.206932809926	48.8198801303845	14.3521380385411	9.6732209409648	4.06995899197364	46.57	887.16	218.24	1.95	111.35	15.03	91.59	5.2	1421.26	2577.01	8	892.63	689.625	169.75	18.625
77	1	65	167.5	85.6	30.4432713149016	1559.67	58.95	217.99	17.6333333333333	15.22	11.51	44.3633333333333	37.9733333333333	19.3033333333333	18.67	.916666666666667	.01	.333333333333333	1.26	2.87	3.58	.35195530726257	18.2204439252336	.688668224299065	2.54661214953271	.458995327102804	.225506230529595	.218107476635514	.0147196261682243	34.0168112485333	55.9066982118012	9.49423676388855	4.95061989608913	4.78819237402784	88.86	470.12	161.71	1.62	70.72	12.36	17.17	2.05	575.27	1206.38	8	834.88	619.5	182.125	33.25
79	1	40	184	85.76	25.2752990413597	4085.55	150.31	542.42	25.1066666666667	41.6266666666667	74.0333333333333	140.766666666667	139.183333333333	106.123333333333	33.06	.99	2.66	1.89333333333333	5.54333333333333	12.4	11.73	.47229326513214	47.6393423507463	1.75268190298507	6.32486007462686	1.64144123134328	1.23744558457711	.385494402985075	.0646377487562189	33.1115761647759	53.1061913328683	13.6914488017429	10.3901147540315	3.23677350662701	208.01	1844.76	332.27	2.63	33.65	41.3	53.9	13.23	1816.16	3034.21	7	935.43	589	291.714	35.857
80	1	46	183.4	73.77	21.8840801675792	2292.79	102.83	275	0	30.89	35.9433333333333	66.8333333333333	64.1966666666667	41.7666666666667	22.43	0	1.62	.15	1.77	3.97	4.21	.420427553444181	31.080249423885	1.39392707062492	3.72780262979531	.905923817269893	.566174144864669	.304053138132032	.0239934932899553	40.3643595793771	47.9764828004309	12.0353695432935	7.28661005441696	3.9131363971406	25.19	1230.74	154.12	1.57	41.24	11.55	34.04	4.88	604.64	2146.7	7	876.43	621.857	204.857	31.714
81	1	62	162.8	113.09	42.5757766788578	1841.12	84	196.55	15.38	19.0533333333333	40.2966666666667	74.73	73.0033333333333	49.4466666666667	23.5566666666667	.873333333333333	.26	.183333333333333	1.31666666666667	2.94	3.6	.363888888888889	16.2801308692192	.742771244141834	1.73799628614378	.660801131841896	.437232882365078	.208300173902791	.0116426445014295	41.0619622838272	42.7022681845833	15.7207996087155	10.7427363054373	5.11789924973205	109.21	651.44	244.9	2.31	81.22	9.1	64.68	5.25	781.44	2289.94	7	919.86	559	309.857	50.857
83	1	50	183.7	72.97	21.5761130960304	3095.08	138.56	334.65	30.8566666666667	41.13	55.37	127.356666666667	124.326666666667	89.3433333333333	34.9833333333333	2.15	2.56	1.13333333333333	5.84333333333333	13.02	14.62	.400136798905609	42.4157873098534	1.89886254625188	4.5861312868302	1.7453748115664	1.22438445023069	.479420766525056	.0800785711022795	40.291042557866	43.2492859635292	16.146709898671	11.5464974518698	4.52115400355834	166.68	2052.33	412.33	6.09	22.91	19.38	31.46	15.15	1558.94	2551.8	6	900.5	665	201.667	31.833
85	1	59	188	99.89	28.2002845727095	2137.29	106.41	213.08	15.0766666666667	23.4233333333333	43.3233333333333	81.8233333333333	80.2666666666667	56.4366666666667	23.83	.983333333333333	.156666666666667	.723333333333333	1.86333333333333	4.34	4.41	.424036281179138	21.3964360796877	1.06527179897888	2.13314646110722	.819101011112223	.564988153635666	.238562418660527	.0186538525711616	44.808612775992	39.8785377744714	14.850981958108	10.562285261554	4.45985336571078	1058.47	1250.32	185.24	3.57	111.08	10.72	206.76	28.88	810.82	1820.68	6	1022.33	510.5	399.333	110
86	1	54	181.1	120.32	36.6056479714858	2983.18	145.98	316.52	23.2233333333333	36.9233333333333	40.6666666666667	100.813333333333	97.0433333333333	57.79	39.2533333333333	1.12666666666667	1.27	1.85333333333333	4.25	9.39	10.79	.393883225208526	24.7937167553191	1.21326462765957	2.63065159574468	.837932180851064	.480302526595745	.326241134751773	.0353224734042553	44.0409227736845	42.4406170596478	13.8266322440849	7.74877814949148	5.26328727510017	221.04	1401.09	355.88	2.82	199.15	16.1	86.42	8.47	1265.21	3662.79	7	875.43	544.571	267.714	53.143
87	1	67	176.7	93.87	29.9985936412232	2749.68	80.24	387.14	18.31	58.0633333333333	43.37	119.743333333333	118.47	76.9766666666667	41.4933333333333	.0533333333333333	4.31	.13	4.49333333333333	10.13	9.55	.470157068062827	29.2924256951103	.85479919036966	4.12421433897944	1.27559390646639	.820034799900572	.442029757465999	.047867618337417	26.2634197433883	56.3178260743068	16.6146331987401	11.1979090900274	6.03609632151135	1364.75	1328.06	245.58	1.81	26.84	20.75	56.25	9.93	908.58	2708.08	7	895.71	651.143	224.143	20.429
91	1	51	182.3	120.4	36.1493361164265	3373.44	136.48	397.34	35.13	20.4266666666667	95.09	150.646666666667	136.386666666667	101.543333333333	34.8433333333333	1.78	.696666666666667	1.86333333333333	4.34	8.3	9.08	.412995594713656	28.0186046511628	1.13355481727575	3.30016611295681	1.15398671096346	.843383167220377	.289396456256921	.036046511627907	36.4114968696642	47.1139252513754	15.9516879926062	12.0403307405299	4.13148991336242	177.37	1507.82	374.36	1.36	82.15	26.2	62.25	9.03	1831.64	3662.7	7	723.86	500.143	195.857	27.857
52	1	57	175	78.08	25.4396354480662	799.26	41.46	62.22	.593333333333333	13.6066666666667	30.1166666666667	44.3166666666667	44.2133333333333	24.4166666666667	19.7966666666667	.0233333333333333	.143333333333333	.826666666666667	.993333333333333	2.2	3.33	.297297297297297	10.2364241803279	.530993852459016	.796875	.56749487704918	.312713456284153	.25354337431694	.0127219945355191	46.6856842579386	31.1388033931387	22.0967199012604	12.2196364970931	9.90749776876945	0	243.4	124.26	1.37	238.66	4.94	31.56	2.51	283.69	973.29	4	690.5	510	172.75	7.75
54	1	55	183.3	82.58	24.5243285037799	2930.34	110.94	301.68	35.57	73.5133333333333	72.2033333333333	181.286666666667	180.71	150.88	29.83	2.24666666666667	2.47	2.46666666666667	7.18333333333333	15.9	15.38	.466840052015605	35.4848631629935	1.34342455800436	3.65318479050618	2.19532574473238	1.8270767740373	.361225478324049	.0869863566642448	34.0731792215238	41.1802043448883	25.5163726187041	20.5955622897002	4.07188244367548	107.85	1275.45	348.34	2.47	49.45	13.41	32.54	7.71	1535.89	3871.2	7	932.29	527.571	354.286	50.286
57	1	49	181.1	83.47	25.3945598086762	2370.98	81.94	300.46	16.9366666666667	18.6366666666667	72.35	107.923333333333	104.893333333333	74.67	30.2233333333333	.39	.206666666666667	3.47	4.06666666666667	8.99	9.3	.437634408602151	28.4051755121601	.981670061099796	3.59961662872888	1.29291961183659	.894572900443273	.362086178666986	.0487200990375784	31.1035942943424	50.6895882715164	18.3300495957606	12.5973226260871	5.0988761327946	275.13	1579.94	273.23	3.37	17.91	30.25	10.84	3.71	1376.59	2336.4	7	842	667.714	148.143	26.143
58	1	52	188.7	95.71	26.8201184868673	1953.84	110.64	139.29	24.5966666666667	33.0466666666667	42.5833333333333	100.226666666667	101.993333333333	76.3033333333333	25.69	1.24333333333333	2.11333333333333	1.89666666666667	5.25333333333333	11.58	11.6	.452586206896552	20.4141677985581	1.15599205934594	1.45533382091735	1.04722599519381	.797234702051336	.26841500365688	.0548880298122802	50.9642550055276	28.5161528067805	18.1430646628382	15.6212040562857	5.25938664373746	68.36	1036.64	347.83	1.76	73.8	12.58	28.05	8.87	1382.36	2245.91	8	1006.63	716.125	242.375	48.125
61	1	50	181	84.78	25.8216172144142	3670.29	164.81	383.22	64.1466666666667	51.62	47.77	163.536666666667	165.713333333333	139.613333333333	26.1	3.17333333333333	2.97666666666667	1.91666666666667	8.06666666666667	18.18	18.58	.434337997847148	43.291932059448	1.94397263505544	4.52016985138004	1.92887473460722	1.64677203743021	.307855626326964	.0951482267830463	40.4134278217797	41.7645472156151	18.0726586524249	15.2155097644419	2.84446188175866	254.13	2034.14	413.21	3.89	163.91	17.97	95.99	8.85	2306.82	4398.96	6	931.67	572.333	328.167	25.833
62	1	54	172.4	67.51	22.6642191688795	1835.17	63.53	210.88	9.26	41.8233333333333	53.8833333333333	104.966666666667	103.65	84.4333333333333	19.2166666666667	.413333333333333	2.78333333333333	3.19	6.38666666666667	13.89	13.31	.480090157776108	27.1836764923715	.941045770996889	3.12368537994371	1.55488075840616	1.25067891176616	.284649187774651	.0946032686515578	31.1562416560864	45.964134112916	21.4990117868737	18.4033813397851	4.18853112609004	110.67	842.34	206.35	1.52	45.84	10.46	97.59	4.95	1127.5	2516.98	7	847.29	656.143	183.286	7.857
63	1	50	180.3	98.17	30.1324548026504	1688.26	64.3	173.6	12.4	31.0133333333333	60.3833333333333	103.796666666667	108.393333333333	97.3033333333333	11.09	.19	1.29	1.38333333333333	2.86333333333333	6.56	6.26	.458466453674121	17.1973107874096	.654986248344708	1.76836100641744	1.05724763165937	.991171776849683	.112967301619639	.029167091100472	34.2778955848033	41.1311053984576	25.3588575198212	23.0541109386785	2.62755736675631	354.58	873.77	104.42	.48	169.73	16.39	79.03	4.19	659.16	1225.34	6	886.83	661.833	208.833	16.167
65	1	45	195.8	93.87	24.4314149075063	1551.37	63.77	142.65	54.7566666666667	40.3066666666667	6.64333333333333	101.706666666667	100.623333333333	81.4133333333333	19.21	1.35333333333333	1.63333333333333	0	2.98666666666667	6.72	6.98	.42836676217765	16.52679237243	.679343773303505	1.51965484180249	1.08351976137211	.867298746493377	.204644721423245	.0318170519512801	36.9950430909454	36.7803941032765	26.6124179073236	20.9913388381452	4.9530415052502	149.7	1118.71	315.96	1.63	39.33	12.6	26.73	4.67	1602.35	1737.15	7	939	613.143	286.143	38.286
66	1	51	182.5	90.63	27.1514744447173	1588.56	60.52	181.69	12.02	39.99	27.27	79.28	81.6766666666667	65.05	16.6266666666667	.786666666666667	.716666666666667	1.29333333333333	2.79666666666667	6.17	6.46	.43343653250774	17.5279708705727	.667770054065983	2.00474456581706	.874765530177645	.717753503254993	.183456544926257	.030858067600868	34.287656745732	45.7496097094224	18.8476945570388	16.3796142418291	4.18660086283594	41.18	579.22	242.84	2.03	23.68	9.26	15.05	4.64	879.63	1580.17	3	895.33	728	144.333	23
70	1	45	166.4	119.34	43.0057539511791	1755.62	106.1	115.65	32.0933333333333	29.7733333333333	22.66	84.5266666666667	83.94	66.1566666666667	17.7833333333333	1.34	1.73	1.03666666666667	4.10666666666667	9.28	9.12	.449561403508772	14.7110775934305	.889056477291771	.969079939668175	.708312384782973	.554354505334897	.149014021563041	.0344114853918775	54.3910413415204	26.3496656451852	18.461572061939	15.0731175691019	4.05174999905067	72.06	718.54	215.42	1.22	33.19	10.11	17.5	4.56	830.46	1279.08	2	848	520.5	317	10.5
71	1	47	175.6	110.32	35.6987004200344	3086.96	183.16	189.4	25.5333333333333	63.4	81.29	170.223333333333	168.003333333333	134.636666666667	33.3666666666667	1.35333333333333	3.39333333333333	6.3	11.0466666666667	24.27	23.82	.463895885810243	27.9818709209572	1.66026105873822	1.7168237853517	1.54305656272661	1.22041938602852	.302453468697124	.100132946579647	53.4001088449478	24.5419441780911	21.8751907477311	17.4458582769672	4.32356320349686	168.87	987.38	579.47	4.66	385.89	19.03	127.49	25.62	2209.56	4749.16	4	752.25	538	202.75	11.5
72	1	62	172.8	76.98	25.723947036471	2103.79	76.15	261.33	39.1733333333333	24.8033333333333	29.2966666666667	93.2733333333333	92.4766666666667	72.75	19.7266666666667	3.12333333333333	.2	1.33666666666667	4.66	10.15	10.01	.465534465534466	27.3290465055859	.989217978695765	3.39477786438036	1.21174330995064	.945050662509743	.256257036459687	.0605352039490777	32.57692070026	49.6874688062972	17.7777777777778	13.8321790673023	3.75069121284285	28.34	1257.25	222.64	1.92	35.9	13.16	28.43	2.47	1221.21	2356.33	6	935.67	628.667	294.167	12.833
73	1	44	180.5	91.7	28.0842027335495	3760.22	163.74	382.19	21.6933333333333	106.063333333333	61.6933333333333	189.45	186.203333333333	141.956666666667	44.2466666666667	1.22333333333333	6.44333333333333	3.48333333333333	11.15	24.43	24.83	.44905356423681	41.0056706652126	1.7856052344602	4.16782988004362	2.0659760087241	1.54805525263541	.482515448927663	.121592148309706	39.190792028126	40.6561318220742	20.6515962882721	15.1008894869626	4.70681679972626	225.18	2116.93	570.24	5	91.09	22.71	118.58	22.23	2660.56	4783.03	5	888.4	674.8	177.2	34.2
75	1	52	185.2	131.24	38.1796052059879	2658.38	95.42	326.99	9.90666666666667	25.4666666666667	87.5366666666667	122.91	122.063333333333	92.4366666666667	29.6266666666667	.756666666666666	1.06666666666667	5.71333333333333	7.53666666666667	17	16.63	.452796151533373	20.2558671136848	.727064919231941	2.49154221274002	.936528497409326	.704333028548207	.225744183683836	.057426597582038	32.304636658416	49.2013933297723	18.2343494434822	13.9087213516001	4.4578527775061	1027.79	1682.25	417.29	2.71	98.1	13.61	124.02	8.97	2122.29	4630.19	7	918.14	609.714	286.143	22.286
78	1	58	169.4	76.41	26.5687158416011	1562.42	58.74	185.17	11.4566666666667	24.1833333333333	37.6266666666667	73.2666666666667	72.1	44.8533333333333	27.2466666666667	.733333333333333	.153333333333333	.983333333333333	1.87	4.19	4.62	.404761904761905	20.4478471404266	.768747546132705	2.42337390393927	.9589059023688	.587008681237185	.356585089211709	.0244732364873708	33.835972401787	47.4059471844958	18.9404024867841	11.4830412650461	6.97550381246187	206.52	841.2	167.4	1.13	27.25	18.72	53.26	2.63	739.87	1631.16	4	796.25	571.25	193.75	23.25
82	1	48	195	93.01	24.406617666494	2443.61	84.41	302.31	21.4166666666667	34.4133333333333	62.84	118.67	115.456666666667	91.4366666666667	24.02	.0666666666666667	.356666666666667	3.20333333333333	3.62666666666667	7.97	9.16	.396288209606987	26.2725513385657	.90753682399742	3.25029566713257	1.27588431351468	.983084256173171	.258251800881626	.0389922230584525	31.0888398721564	49.4858017441409	17.9619328716843	14.9674729873698	3.93188765801417	188	1167.3	299.26	1.85	89.02	14.44	149.81	10.02	1126.11	3410.51	6	946.5	592	270.333	83.833
84	1	40	184.5	86.8	25.4433422843682	1612.62	59.22	143.59	34.0933333333333	43.11	49.1166666666667	126.32	128.83	88.6633333333333	40.1666666666667	.02	1.69333333333333	2.83	4.54333333333333	9.67	4.38	1.0365296803653	18.5785714285714	.682258064516129	1.65426267281106	1.45529953917051	1.02146697388633	.462749615975422	.0523425499231951	33.050563678982	35.6165742704419	31.4226901573995	21.9923685265799	9.96308285068191	132.33	1271.65	340.7	2.39	649.81	16.63	223.01	8.48	1185.31	2636.43	7	769.71	499.286	209.429	25.857
88	1	60	179	93.5	29.1174088873587	2260.4	113.28	207.07	29.35	30.02	53.7766666666667	113.146666666667	108.89	73.9833333333333	34.9066666666667	.643333333333333	2.065	2.88666666666667	5.595	10.8	12.86	.381804043545879	24.1754010695187	1.21155080213904	2.21465240641711	1.10320855614973	.79126559714795	.373333333333333	.0598395721925134	45.1035215006194	36.6430720226509	18.0573669330486	13.0920780982717	6.17707780333864	98.33	1525.59	341.05	1.63	41.08	15.16	45.97	2.66	1550.02	2411.74	5	863.6	642.2	205.2	14.6
89	1	48	181	95.08	28.9587091854977	3695.62	161.26	363.51	115.173333333333	38.7933333333333	43.5966666666667	197.563333333333	196.386666666667	152.91	43.4766666666667	3.61666666666667	1.95	.21	5.77666666666667	12.73	14.49	.398895790200138	38.8685317627261	1.6960454354228	3.82320151451409	2.07782919646613	1.60822465292385	.457264058336839	.0607558547188333	39.2718948376727	39.3449542972492	21.3206131996568	16.55040290939	4.70575077163417	138.65	1829.6	356.51	1.42	56.95	19.83	19.72	14.13	1191.32	3535.29	5	923.6	656.4	210.8	45.4
90	1	64	175	95.23	31.027362752553	2925.37	114.13	349.69	18.4633333333333	52.3833333333333	54.02	124.866666666667	123.656666666667	85.8833333333333	37.7733333333333	.396666666666667	1.4	1.99666666666667	3.79333333333333	8.63	8.42	.451306413301663	30.7189961146697	1.19846686968392	3.67205712485561	1.311141447023	.901851657390878	.396653715565823	.0398333858377962	35.1124814980669	47.8148063321905	17.5090360284245	11.743243874564	5.16493070392235	121.78	916.74	399.88	1.82	84.71	30.28	96.31	4.67	1678.41	2789.07	5	784.6	606	155.8	11.2
[truncated: 42 more columns]
